# Supplementary material
Source: HighWire-hosted journal article supplement (https://www.jneurosci.org/highwire/filestream/601016/field_highwire_adjunct_files/0/Supplemental_Material.pdf)
Supplement: Supplemental_Material.pdf [file Supplemental_Material.pdf]

Supplemental Section: Felsted et al., “Genetically determined differences in brain response to a primary food reward

### **Genotyping Procedure**

The Oragene-DNA Self-Collection Kit (vial format) was used for the collection, preservation, and purification of DNA from saliva. After participants delivered saliva into the container, it was capped, resulting in releasing DNA-preserving fluid that mixes with the saliva. The DNA from each sample was extracted according to the manufacturer’s instructions. The *TaqIA* single nucleotide polymorphism (SNP; rs1800497; Accession Number: NP\_848605.1) region of the ANKK1 gene, located downstream from the DRD2 gene (Neville et al., 2004), was amplified for each genomic sample using polymerase chain reaction (PCR) techniques, run on an iCycler thermocycler (Bio-Rad), based on primer sequences specific for the sequence of interest (*TaqIA* SNP specific primers: forward 5’-CCCTTCCTGAGTGTCATCA-3’, reverse 5’-CGGCTGGCCAAGTTGTCT-3’). The amplified PCR products were digested overnight with the *TaqI* restriction enzymes and analyzed using 3% agarose gel electrophoresis. Images of each processed gel were obtained using a cooled-CCD digital imaging system (ChemiDoc, Bio-Rad). The presence or absence of a given allele was established based on the predicted sizes of the PCR products. *TaqIA* allele status was determined as follows: a) for individuals without the A1 variant (A2/A2 genotype) two bands of predicted sizes 177 base pairs (bp) and 127 bp were observed, b) individuals with the A1/A2 genotype displayed three bands of predicted sizes 307 bp, 177 bp, and 127 bp, and c) individuals with the A1/A1 genotype showed a single band of predicted size 307 bp (Epstein et al., 2007).

Supplemental Table 1.

| <b>Eating Behavior</b>                   |                                             |                             | <b>A1+</b>       | <b>A1-</b>       |
|------------------------------------------|---------------------------------------------|-----------------------------|------------------|------------------|
| Dutch Eating Behavior Questionnaire      | Emotional Eating – Total                    | F(1,24)=0.04, p=0.84        | 2.42±0.27        | 2.36±0.21        |
|                                          | Emotional Eating – Diffuse Emotions         | F(1,24)=0. p=1              | 2.65±0.25        | 2.65±0.27        |
|                                          | Emotional Eating – Clearly Labeled Emotions | F(1,24)=0.08, p=0.78        | 2.32±0.29        | 2.22±0.19        |
|                                          | External Eating                             | F(1,24)=0.13, p=0.72        | 3.28±0.12        | 3.34±0.10        |
|                                          | Restrained Eating                           | F(1,24)=0.80, p=0.38        | 2.42±0.25        | 2.72±0.24        |
| Three Factor Eating Questionnaire        | Restraint                                   | F(1,24)=0.33, p=0.57        | 7.69±1.52        | 9.0±1.84         |
|                                          | Disinhibition                               | F(1,24)=0.77, p=0.39        | 8.15±1.16        | 6.85±1.03        |
|                                          | Hunger                                      | F(1,24)=0.37, p=0.55        | 6.77±1.27        | 5.77±1.16        |
| Power of Food Scale                      | Food Available                              | F(1,24)=0.04, p=0.85        | 13.62±1.68       | 14.08±1.89       |
|                                          | Food Present                                | F(1,24)=0.01, p=0.93        | 17.54±1.84       | 17.31±1.87       |
|                                          | Food Tasted                                 | F(1,24)=0.002, p=0.96       | 14.54±1.28       | 14.46±1.17       |
| Binge Eating Scale                       |                                             | F(1,24)=0.36, p=0.55        | 12.54±2.31       | 10.77±1.99       |
| <b>Personality</b>                       |                                             |                             | <b>A1+</b>       | <b>A1-</b>       |
| Tridimensional Personality Questionnaire | Novelty Seeking 0                           | F(1,24)=2.68, p=0.11        | 18.08±1.25       | 14.69±1.75       |
|                                          | Novelty Seeking 1                           | F(1,24)=0.96, p=0.34        | 6.31±0.34        | 5.62±0.65        |
|                                          | Novelty Seeking 2                           | F(1,24)=0.29, p=0.60        | 2.31±0.52        | 1.92±0.53        |
|                                          | Novelty Seeking 3                           | F(1,24)=2.46, p=0.13        | 4.31±0.36        | 3.31±0.56        |
|                                          | Novelty Seeking 4                           | F(1,24)=3.20, p=0.09        | 5.15±0.47        | 3.85±0.60        |
|                                          | Harm Avoidance 0                            | F(1,24)=0.27, p=0.61        | 12.38±1.79       | 11.23±1.45       |
|                                          | Harm Avoidance 1                            | F(1,24)=0.41, p=0.53        | 2.92±0.65        | 2.38±0.58        |
|                                          | Harm Avoidance 2                            | F(1,24)=0.19, p=0.67        | 4.15±0.53        | 3.85±0.53        |
|                                          | Harm Avoidance 3                            | F(1,24)=0.45, p=0.51        | 2.31±0.67        | 2.92±0.68        |
|                                          | Harm Avoidance 4                            | F(1,24)=1.08, p=0.31        | 3±0.68           | 2.08±0.63        |
|                                          | Reward Drive 0                              | F(1,24)=0.63, p=0.44        | 19.69±1.08       | 20.77±0.92       |
|                                          | <b>Reward Drive 1</b>                       | <b>F(1,24)=4.72, p=0.04</b> | <b>3.69±0.25</b> | <b>4.38±0.22</b> |
|                                          | Reward Drive 2                              | F(1,24)=0.47, p=0.50        | 5.77±0.50        | 5.31±0.49        |
|                                          | Reward Drive 3                              | F(1,24)=0.03, p=0.87        | 6.69±0.65        | 6.85±0.73        |
|                                          | Reward Drive 4                              | F(1,24)=2.72, p=0.11        | 3.54±0.35        | 4.23±0.27        |
| Barrett Impulsiveness Scale (Version 11) | Total                                       | F(1,24)=0.36, p=0.55        | 60.46±3.42       | 58.08±2.29       |
|                                          | Factor 1                                    | F(1,24)=1.14, p=0.30        | 10±0.76          | 8.85±0.82        |
|                                          | Factor 2                                    | F(1,24)=0.01, p=0.91        | 14.54±1.06       | 14.38±0.85       |
|                                          | Factor 3                                    | F(1,24)=2.33, p=0.14        | 12.77±1.10       | 10.85±0.72       |
|                                          | Factor 4                                    | F(1,24)=0.007, p=0.93       | 11.23±0.76       | 11.15±0.56       |
|                                          | Factor 5                                    | F(1,24)=0.29, p=0.59        | 6.62±0.63        | 7±0.39           |
|                                          | Factor 6                                    | F(1,24)=0.77, p=0.39        | 5.31±0.48        | 5.85±0.42        |

|         |              |                      |            |            |
|---------|--------------|----------------------|------------|------------|
| BIS/BAS | Factor One   | F(1,24)=0.21, p=0.65 | 15.31±0.79 | 14.69±1.13 |
|         | Factor Two   | F(1,24)=0.02, p=0.89 | 21.15±1.38 | 21.38±0.93 |
|         | Factor Three | F(1,24)=1.08, p=0.31 | 24±1.70    | 22±1.07    |
|         | BIS          | F(1,23)=0.04, p=0.85 | 3.06±0.11  | 3.02±0.17  |
|         | BAS - Total  | F(1,23)=2.00, p=0.17 | 3.28±0.12  | 3.08±0.08  |
|         | BAS - D      | F(1,23)=1.49, p=0.24 | 2.98±0.20  | 2.69±0.14  |
|         | BAS - R      | F(1,23)=0.02, p=0.88 | 3.63±0.11  | 3.62±0.06  |
|         | BAS - F      | F(1,23)=2.94, p=0.10 | 3.15±0.16  | 2.81±0.13  |

Supplemental Table 2

| Area or Contrast                              | Co-ordinate (# of voxels in cluster) | Z statistic | p value* |
|-----------------------------------------------|--------------------------------------|-------------|----------|
| Main Effect of Milkshake                      |                                      |             |          |
| (Milkshake – Tasteless)                       |                                      |             |          |
| Left Insula Extending into Striatum           |                                      |             |          |
| <i>Ventral Insular Cortex</i>                 | -42, -3, -3 (493)                    | 5.0         | 0.001    |
| <i>Dorsal Insular Cortex</i>                  | -45, -9, 15                          | 4.7         | 0.001    |
| <i>Putamen</i>                                | -27, 3, 3                            | 4.5         | 0.002    |
| Right Insula Extending into Striatum/Amygdala |                                      |             |          |
| <i>Globus Pallidus</i>                        | 36, -12, -6 (254)                    | 4.7         | 0.001    |
| <i>Putamen</i>                                | 27, -6, 3                            | 4.5         | 0.002    |
| <i>Dorsal Insula</i>                          | 42, -9, 12                           | 4.5         | 0.002    |
| <i>Amygdala</i>                               | 33, -3, -9                           | 4.4         | 0.002    |
| Right Anterior Dorsal Insula                  | 36, 27, 3 (4)                        | 3.2         | 0.02     |
| Right Ventroposteromedial Thalamus            | 12, -21, 6 (85)                      | 4.8         | 0.001    |
| Left Ventroposteromedial Thalamus             | -12, -15, 9 (68)                     | 4.4         | 0.002    |
| Left Operculum (Rolandic)                     | -63, 6, 15 (3)                       | 4.3         | 0.002    |

|                           |                |     |       |
|---------------------------|----------------|-----|-------|
| Right Operculum (frontal) | 63,12,24 (6)   | 3.9 | 0.003 |
|                           | 66, 6, 15 (10) | 3.6 | 0.004 |

P values are FDR corrected across the entire brain unless indicated by \*, in which case FDR correction is across the voxels within the region of interest.

Supplemental Table 3

| Area or Contrast                | Co-ordinate (# of voxels in cluster) | Z-statistic | p-value |
|---------------------------------|--------------------------------------|-------------|---------|
| <b>Non Carriers (A1-)</b>       |                                      |             |         |
| <b>Milkshake - tasteless</b>    |                                      |             |         |
| Left Operculum                  |                                      |             |         |
| Rolandic                        | -66, -27, 24 (281)                   | 5.3         | 0.002   |
| Frontal                         | -51, -57, -18 (22)                   | 3.4         | 0.05    |
| Right Operculum                 |                                      |             |         |
| Rolandic                        | 69, -18, 27 (181)                    | 4.3         | 0.01    |
| Right Amygdala/Ventral Striatum |                                      |             |         |
| <i>Globus Pallidus</i>          | 36, -15, -6 (769)                    | 4.7         | 0.005   |
| <i>Amygdala/Pallidus</i>        | 33, -6, -9                           | 4.6         | 0.005   |
| Left Amygdala/Ventral Striatum  |                                      |             |         |
| <i>Amygdala/Pallidus</i>        | -33, -6, -6 (120)                    | 4.3         | 0.01    |
| Left Cerebellum                 |                                      |             |         |
|                                 | -24, -57, -24 (84)                   | 4.3         | 0.01    |
|                                 | -15, -75, -27 (10)                   | 3.5         | 0.03    |
| Right Cerebellum                |                                      |             |         |
|                                 | 15, -57, -18                         | 3.4         | 0.04    |
| Pons                            | 0, -18, -3 (15)                      | 3.7         | 0.03    |

|                      |                  |     |        |
|----------------------|------------------|-----|--------|
| Medial Frontal Gyrus | 33, 27, 36 (22)  | 3.5 | 0.04   |
| Left Dorsal Insula   | -39, -9, 18 (27) | 3.4 | 0.04   |
| Right Thalamus       |                  |     |        |
| <i>Mediodorsal</i>   | 9, -21, 12 (80)  | 4.5 | 0.003* |
| <i>Anterior</i>      | 12, -6, 3        | 3.4 | 0.005* |
| Left Thalamus        |                  |     |        |
| Mediodorsal          | -9, -15, 9       | 4.1 | 0.003* |
| Right Midbrain       |                  |     |        |
| Substantia Nigra     | 3, -15, -12 (51) | 3.7 | 0.03*  |
| Left Midbrain        |                  |     |        |
| Substantia Nigra     | -9, -24, -12 (4) | 3.2 | 0.04*  |

P values are FDR corrected across the entire brain unless indicated by \*, in which case FDR correction is across the voxels within the region of interest. Regions written in italics indicate anatomically distinct significant peaks within a cluster.

Supplemental Table 4

| Area or Contrast           | Co-ordinate (# of voxels in cluster) | Z-value | p-value            |
|----------------------------|--------------------------------------|---------|--------------------|
| <b>Carriers (A1+)</b>      |                                      |         |                    |
| <b>Tasteless-milkshake</b> |                                      |         |                    |
| Right Caudate              | 21, -18, 24 (8)                      | 3.4     | 0.05* (one-tailed) |
|                            | -18, 18, 9 (4)                       | 3.2     | 0.05* (one-tailed) |

|          |                 |     |             |
|----------|-----------------|-----|-------------|
| Thalamus | 0, -12, 9 (3)   | 3.1 | 9.32* (n/s) |
|          | -3, -21, 15     | 3.0 | 0.32*(n/s)  |
| Midbrain | -3, 15, -12 (6) | 3.2 | 0.15* (n/s) |

\* P values are FDR corrected across the across the voxels within regions of interest. Non significant trends are reported here because they help to explain the significant interaction between stimulus and genotype within the thalamus and midbrain. A one-tailed criterion significance was used for the caudate nucleus because we had a specific prediction about this region and the direction of the effect from our prior studies (Stice et al., 2008a; Stice et al., 2008b).

## References Cited

- Epstein LH, Temple JL, Neaderhiser BJ, Salis RJ, Erbe RW, Leddy JJ (2007) Food reinforcement, the dopamine D2 receptor genotype, and energy intake in obese and nonobese humans. *Behav Neurosci* 121:877-886.
- Neville MJ, Johnstone EC, Walton RT (2004) Identification and characterization of ANKK1: a novel kinase gene closely linked to DRD2 on chromosome band 11q23.1. *Hum Mutat* 23:540-545.
- Stice E, Bohon C, Veldhuizen MG, Small DM (2008a) Relation of reward from food intake and anticipated food intake to obesity: A functional magnetic resonance imaging study. *J Abn Psychol* 117:924-935.
- Stice E, Spoor S, Bohon C, Small DM (2008b) Relation between obesity and blunted striatal response to food is moderated by *TaqIA* A1 allele. *Science* 322:449-452.
